# Supplementary material
Source: Springer Nature journal article supplement (https://www.springermedizin.de/resource/supplementary/12873_2011_164_MOESM2_ESM.pdf/9431566)
Supplement: MOESM2 [file 9431566]

| TRIAGE PRIORITY | MAXIMUM WAITING TIME STANDARD | CLINICALS SCENARIOS                                                                                                                                                                                                                                                                                                                                                   |
|-----------------|-------------------------------|-----------------------------------------------------------------------------------------------------------------------------------------------------------------------------------------------------------------------------------------------------------------------------------------------------------------------------------------------------------------------|
| <b>P-1</b>      | Immediately                   | Patients with compromised ABC, severe bleeding, decreased level of consciousness, severe medical problems, poisoning with altered mental status, burn > 15%, Acute Airway Obstruction, drug overdose, Ongoing Seizures, trauma patients those fulfilling trauma activation criteria                                                                                   |
| <b>P-2</b>      | With in 15 minutes            | Cardiac chest pain, GCS<9,Open fracture with massive bleeding, fever >40 c , especially children & elderly, sever dehydration, SOB but able to give history, acute abdominal pain with LMP 6 weeks or Ectopic pregnancy, Pre-eclampsia, Acute Psychosis, History of Seizures, vitally unstable patients.                                                              |
| <b>P-3</b>      | With in 60 minutes            | Non cardiac chest pain (history and -ve EKG), SOB with no history of Asthma & can sit comfortably, poisoning with GCS 15 acute abdominal pain. Pain (not Ectopic), Depression, Eye trauma ((no threat to vision), Diarrhea with mild dehydration. Musculoskeletal trauma                                                                                              |
| <b>P-4</b>      | With in 2 hours               | Viral syndromes, respiratory infections, suture removal, mild UTI, nausea vomiting & diarrhea without dehydration, cough with underlying signs of COPD or asthma. 1 <sup>st</sup> & 2 <sup>nd</sup> Degree Burns of < 5%, children with fever < 39 C , minor abrasions & sprains , Insect bits without any systematic symptoms, patients only for Drug Administration |
